# Supplementary material for: Glyphosate-based herbicide: a risk factor for demyelinating conditions of the peripheral nervous system?
Source: PubMed Central journal article supplement — Neural Regen Res. 2019 Aug 7;14(12):2079–80. doi: 10.4103/1673-5374.262579 (PMC6788227; doi:10.4103/1673-5374.262579), 2019-08-07
Supplement: NRR-14-2079_Suppl1.pdf [file NRR-14-2079_Suppl1.pdf]

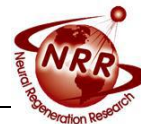

## OPEN PEER REVIEW REPORT 1

**Name of journal:** Neural Regeneration Research

**Manuscript NO:** NRR-D-19-00183

**Title:** Glyphosate-based herbicide: A risk factor for demyelinating conditions of the peripheral nervous system?

**Reviewer's Name:** Bogdan K. Beirowski

**Reviewer's country:** USA

**Date sent for review:** 2019-04-11

**Date reviewed:** 2019-04-22

**Review time:** 11 days

### COMMENTS TO AUTHORS

This is an eloquently written commentary on recent work about the myelin damaging effects of glyphosate-based herbicides. Despite the extensive media coverage on the toxicity of glyphosate as well as its cancerogenic effects with legal ramifications in recent months, I was not aware of the detrimental effects of glyphosate formulations on myelination; therefore it was a very interesting read for me. Congratulations to the authors for writing this informative piece.

My only suggestion for improvement concerns the mention of the GBH product that actually evokes demyelination in the hands of the authors. Perhaps it would be useful for the readers to know the tradename, in order to distinguish it from other products that possibly show a different composition of auxiliary compounds.
