# Supplementary material for: Glyphosate-based herbicide: a risk factor for demyelinating conditions of the peripheral nervous system?
Source: PubMed Central journal article supplement — Neural Regen Res. 2019 Aug 7;14(12):2079–80. doi: 10.4103/1673-5374.262579 (PMC6788227; doi:10.4103/1673-5374.262579), 2019-08-07
Supplement: NRR-14-2079_Suppl2.pdf [file NRR-14-2079_Suppl2.pdf]

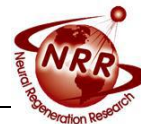

## OPEN PEER REVIEW REPORT 2

**Name of journal:** Neural Regeneration Research

**Manuscript NO:** NRR-D-19-00183

**Title:** Glyphosate-based herbicide: A risk factor for demyelinating conditions of the peripheral nervous system?

**Reviewer's Name:** Donald Albert Godfrey

**Reviewer's country:** USA

**Date sent for review:** 2019-04-11

**Date reviewed:** 2019-04-16

**Review time:** 5 days

### COMMENTS TO AUTHORS

The article is well written, and I found only a few difficulties:

On the third page of the text, line 44, I was not sure of the English meaning of "surveil". Should the English equivalent be "survey"?

On the next line, "defending microbial pathogens" was unclear to me. Should it be "defending against microbial pathogens"?

Based on the listing in PubMed and your previous publication, "Defarge et al." should be 2017 rather than 2018.

The figures in your original publication are very well presented. It would help this review to include some kind of summary figure of the findings.
