# Supplementary material for: Glyphosate-based herbicide: a risk factor for demyelinating conditions of the peripheral nervous system?
Source: PubMed Central journal article supplement — Neural Regen Res. 2019 Aug 7;14(12):2079–80. doi: 10.4103/1673-5374.262579 (PMC6788227; doi:10.4103/1673-5374.262579), 2019-08-07
Supplement: NRR-14-2079_Suppl3.pdf [file NRR-14-2079_Suppl3.pdf]

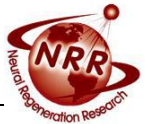

## OPEN PEER REVIEW REPORT 3

**Name of journal:** Neural Regeneration Research

**Manuscript NO:** NRR-D-19-00183

**Title:** Glyphosate-based herbicide: A risk factor for demyelinating conditions of the peripheral nervous system?

**Reviewer's Name:** Annas Al-Sharea

**Reviewer's country:** Australia

**Date sent for review:** 2019-04-11

**Date reviewed:** 2019-04-25

**Review time:** 14 days

### COMMENTS TO AUTHORS

The article adequately surveys the relevant information regarding the effect of a commonly used herbicide and how a variation/s of the herbicidal compound that may contain undisclosed material may lead to PNS damage. The article is written well and identifies some important points of discussion without overstating the existing data.
